# Supplementary material
Source: publisher figshare collection journal article supplement (https://acs.figshare.com/ndownloader/files/4700389)
Supplement: Supplementary file 1 [file 4700389]

# Supporting Information for

## Quantitative identification of unknown exposure pathways of phthalates based on measuring their metabolites in human urine

*Hiroaki Itoh<sup>\*, †</sup>, Kikuo Yoshida<sup>‡</sup>, Shigeki Masunaga<sup>†</sup>*

<sup>†</sup> Graduate School of Environment and Information Sciences, Yokohama National University, Tokiwadai 79-7, Hodogaya-ku, Yokohama, 240-8501 Japan,

<sup>‡</sup> Research Center for Chemical Risk Management, National Institute of Advanced Industrial Science and Technology, Onogawa 16-1, Tsukuba, 305-8569 Japan

\* **corresponding author phone:** +81 3 3542 2511 (ext 3391); **fax:** +81 3 3547 8578; **email:** itoh-hiroaki@umin.ac.jp; **present mailing address:** Epidemiology and Prevention Division, Research Center for Cancer Prevention and Screening, National Cancer Center, 5-1-1 Tsukiji, Chuo-ku, Tokyo, 104-0045 Japan

Number of pages: 5

Number of figures: 0

Number of tables: 2

## Urinary phthalate analysis

We measured five urinary phthalate metabolites using enzymatic deconjugation, solid-phase extraction, and high-performance liquid-chromatography isotope-dilution tandem mass spectrometry (isotope-dilution LC-MS/MS). The analytical methods used in the present study have been described in detail previously (1). In addition to MBP and MEHP, which have been analyzed previously (1), three phthalic acid monoesters, MMP, MEP, and MBzP, were newly targeted for the present analysis.

Standard substances, MMP (99.7%, Riedel-de Haën, Germany), MEP (98.4%, Hayashi Pure Chemical Ind., Ltd., Osaka, Japan), and MBzP (> 98%, TCI Tokyo Kasei Kogyo co. Ltd., Tokyo, Japan), and their corresponding isotopically-labeled internal-standard substances, MMP-<sup>13</sup>C<sub>4</sub> (99%, Cambridge Isotope Laboratories, Inc., Andover, MA, USA), MEP-d<sub>4</sub> (98.8%, Hayashi Pure Chemical Ind., Ltd., Osaka, Japan), and MBzP-d<sub>4</sub> (99.9%, Hayashi Pure Chemical Ind., Ltd., Osaka, Japan), were newly purchased.

For the analysis of five analytes in urine samples, our past chromatographic conditions in the LC-MS/MS procedure (1) were partially modified to ensure their chromatographic separation from sample matrices (Table S1). A smaller-particle column (RS Pro C<sub>18</sub>, 3μm, 2.1 mm i.d. × 100 mm, YMC, Kyoto, Japan), lower flow rate, and gentle slope gradient were newly employed. A line-splitter was not used in the present study. Incidentally, the separability of MBP from a structural isomer, mono-iso-butyl phthalate (MiBP), was previously checked. Although their baseline separation was not always achieved, the peak size of MiBP was adequately smaller than that of MBP. The reproducibility of the MBP measurement value was relatively good (shown in Table S2). The MiBP reference substance was a generous gift from Dr. Toshinari Suzuki (Tokyo Metropolitan Institute of Public Health, Tokyo, Japan).

The analytical conditions are summarized in Table S2. The analytical limits of detection (LODs) and limits of quantification (LOQs) were calculated in three ways as follows. First, the instrumental LOD and LOQ in LC-MS/MS were set at a signal-to-noise ratio of 3 and 6, respectively. Second, LOD and LOQ were set as three and six times of the standard deviation of method-blank test values (n = 4), respectively. Third, the standard deviations derived from the repeated measurements (n = 5) of the five lowest standards were plotted against their concentrations. The intercept of their best-fit line was defined as the standard deviation of the concentration approaches zero (SD<sub>0</sub>). LOD was set as three times of SD<sub>0</sub>. LOQ was the concentration equal to 10%, which is calculated from the best-fit line of the relative standard deviations of the same repeated measurements. Thus, the largest value among the three was finally employed.

MEP, MBP, MBzP and MEHP were detected in all of the urine samples while MMP was detected in 35 of the samples. The MMP in one sample was less than the LOD. The MMP signal on LC-MS/MS was so poor that the LOD of MMP was higher than that of the other four compounds. For the concentration in a urine sample less than the LOD, a value equal to the LOD divided by the square root of 2 was substituted (2, 3).

1

2 **Tables**

3

4 Table S1. HPLC gradient method.

| Time (min) | 0.0 | 4.0 | 4.01 | 17 | 24 | 24.01 | 28  | 28.01 | 40 |
|------------|-----|-----|------|----|----|-------|-----|-------|----|
| %A         | 90  | 90  | 85   | 75 | 35 | 0     | 0   | 90    | 90 |
| %B         | 10  | 10  | 15   | 25 | 65 | 100   | 100 | 10    | 10 |

5 \* Flow rate: 0.35 mL/min; mobile phase A: 1-mL acetic acid in 1-L ultra-pure water; mobile phase B:  
6 1-mL acetic acid in 1-L acetonitrile.

7

8

1 Table S2. Analytical conditions of phthalate monoesters.

| Compound                          | Monitor ion<br>(m/z) |         | MS/MS<br>parameters |                   | RT*   | Mean<br>recovery <sup>†</sup> | Reproducibility <sup>‡</sup> | LOD    | LOQ    |
|-----------------------------------|----------------------|---------|---------------------|-------------------|-------|-------------------------------|------------------------------|--------|--------|
|                                   | Precursor            | Product | Cone<br>[V]         | Collision<br>[eV] | [min] |                               | [μg/L]                       | [μg/L] | [μg/L] |
| MMP                               | 178.9                | 76.9    | 50                  | 23                | 7.70  | –                             | 3.7%                         | 4.0    | 7.9    |
| MMP- <sup>13</sup> C <sub>4</sub> | 182.9                | 78.9    | 48                  | 21                | 7.70  | 54%                           | –                            | –      | –      |
| MEP                               | 192.9                | 76.9    | 48                  | 23                | 11.6  | –                             | 27%                          | 0.30   | 0.60   |
| MEP-d <sub>4</sub>                | 196.8                | 80.9    | 40                  | 18                | 11.5  | 66%                           | –                            | –      | –      |
| MBP                               | 220.8                | 76.9    | 50                  | 23                | 22.4  | –                             | 0.74%                        | 0.27   | 0.87   |
| MBP-d <sub>4</sub>                | 224.9                | 80.9    | 50                  | 22                | 22.6  | 92%                           | –                            | –      | –      |
| MBzP                              | 254.9                | 182.8   | 50                  | 11                | 23.1  | –                             | 0.92%                        | 0.15   | 0.30   |
| MBzP-d <sub>4</sub>               | 258.9                | 186.9   | 60                  | 11                | 23.0  | 86%                           | –                            | –      | –      |
| MEHP                              | 277.0                | 133.8   | 40                  | 16                | 26.9  | –                             | 0.81%                        | 0.27   | 0.54   |
| MEHP-d <sub>4</sub>               | 281.1                | 137.8   | 40                  | 16                | 26.9  | 93%                           | –                            | –      | –      |

2 \* RT: retention time.

3 † Total surrogate recovery in 36 urine samples (tested using the previous HPLC gradient (1)).

4 ‡ Reproducibility of measurement (n = 3, inter-day extraction, intra-day LC-MS/MS measurement).

5

1  
2  
3  
4  
5  
6  
7  
8  
9  
10  
11

References

(1) Itoh, H.; Yoshida, K.; Masunaga, S. Evaluation of the effect of governmental control of human exposure to two phthalates in Japan using a urinary biomarker approach. *Int J Hyg Environ Health* **2005**, *208*, 237-245.

(2) U.S. Environmental Protection Agency Guidelines for Exposure Assessment. *Federal Register* **1992**, *57*, 22888-22938.

(3) Silva, M. J.; Barr, D. B.; Reidy, J. A.; Malek, N. A.; Hodge, C. C.; Caudill, S. P.; Brock, J. W.; Needham, L. L.; Calafat, A. M. Urinary levels of seven phthalate metabolites in the U.S. population from the National Health and Nutrition Examination Survey (NHANES) 1999-2000. *Environ. Health Perspect.* **2004**, *112*, 331-338.
